# Supplementary material for: Role of the RAGE Axis during the Immune Response after Severe Trauma: A Prospective Pilot Study
Source: Hindawi journal article supplement (doi:10.1155/2015/691491), 2015-01-01

S1

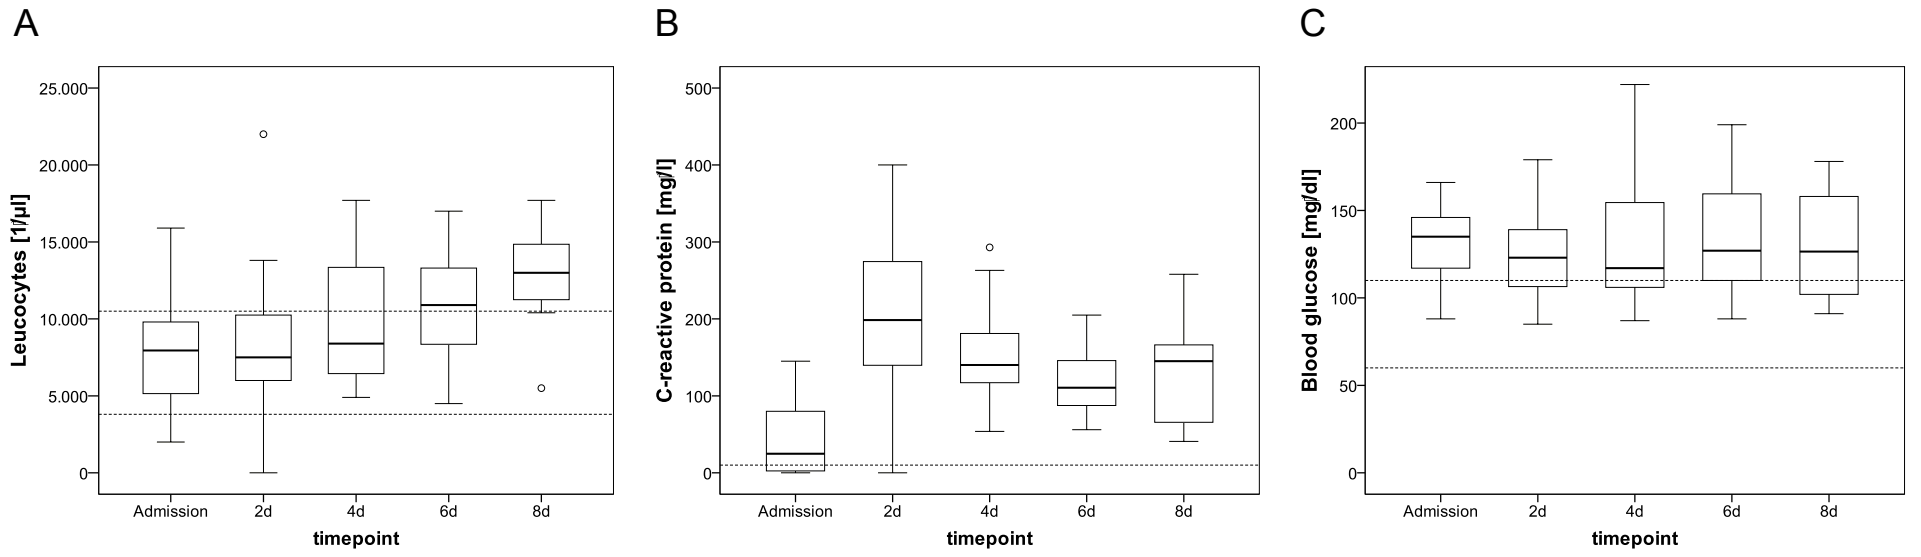

Supplement: f1 [file 691491.f1.pdf]
